# Supplementary material for: R-loops coordinate with SOX2 in regulating reprogramming to pluripotency
Source: PubMed Central journal article supplement — Sci Adv. 2020 Jun 10;6(24):eaba0777. doi: 10.1126/sciadv.aba0777 (PMC7360481; doi:10.1126/sciadv.aba0777), 2020-06-10
Supplement: supp_6_24_eaba0777__1.pdf [file supp_6_24_eaba0777__1.pdf]

[advances.sciencemag.org/cgi/content/full/6/24/eaba0777/DC1](https://advances.sciencemag.org/cgi/content/full/6/24/eaba0777/DC1)

## Supplementary Materials for

### **R-loops coordinate with SOX2 in regulating reprogramming to pluripotency**

Yaoyi Li, Yawei Song, Wei Xu, Qin Li, Xinxiu Wang, Kuan Li, Juehan Wang, Zicong Liu, Sergiy Velychko, Rong Ye, Qing Xia, Lei Wang, Rong Guo, Xiaotao Dong, Zhikai Zheng, Yushuang Dai, Haojie Li, Mingze Yao, Yuanchao Xue, Hans R. Schöler, Qianwen Sun\*, Hongjie Yao\*

\*Corresponding author. Email: [sunqianwen@mail.tsinghua.edu.cn](mailto:sunqianwen@mail.tsinghua.edu.cn) (Q.S.); [yao\\_hongjie@gibh.ac.cn](mailto:yao_hongjie@gibh.ac.cn) (H.Y.)

Published 10 June 2020, *Sci. Adv.* **6**, eaba0777 (2020)

DOI: [10.1126/sciadv.aba0777](https://doi.org/10.1126/sciadv.aba0777)

#### **The PDF file includes:**

Figs. S1 to S7

Legends for tables S1 to S3

#### **Other Supplementary Material for this manuscript includes the following:**

(available at [advances.sciencemag.org/cgi/content/full/6/24/eaba0777/DC1](https://advances.sciencemag.org/cgi/content/full/6/24/eaba0777/DC1))

Tables S1 to S3

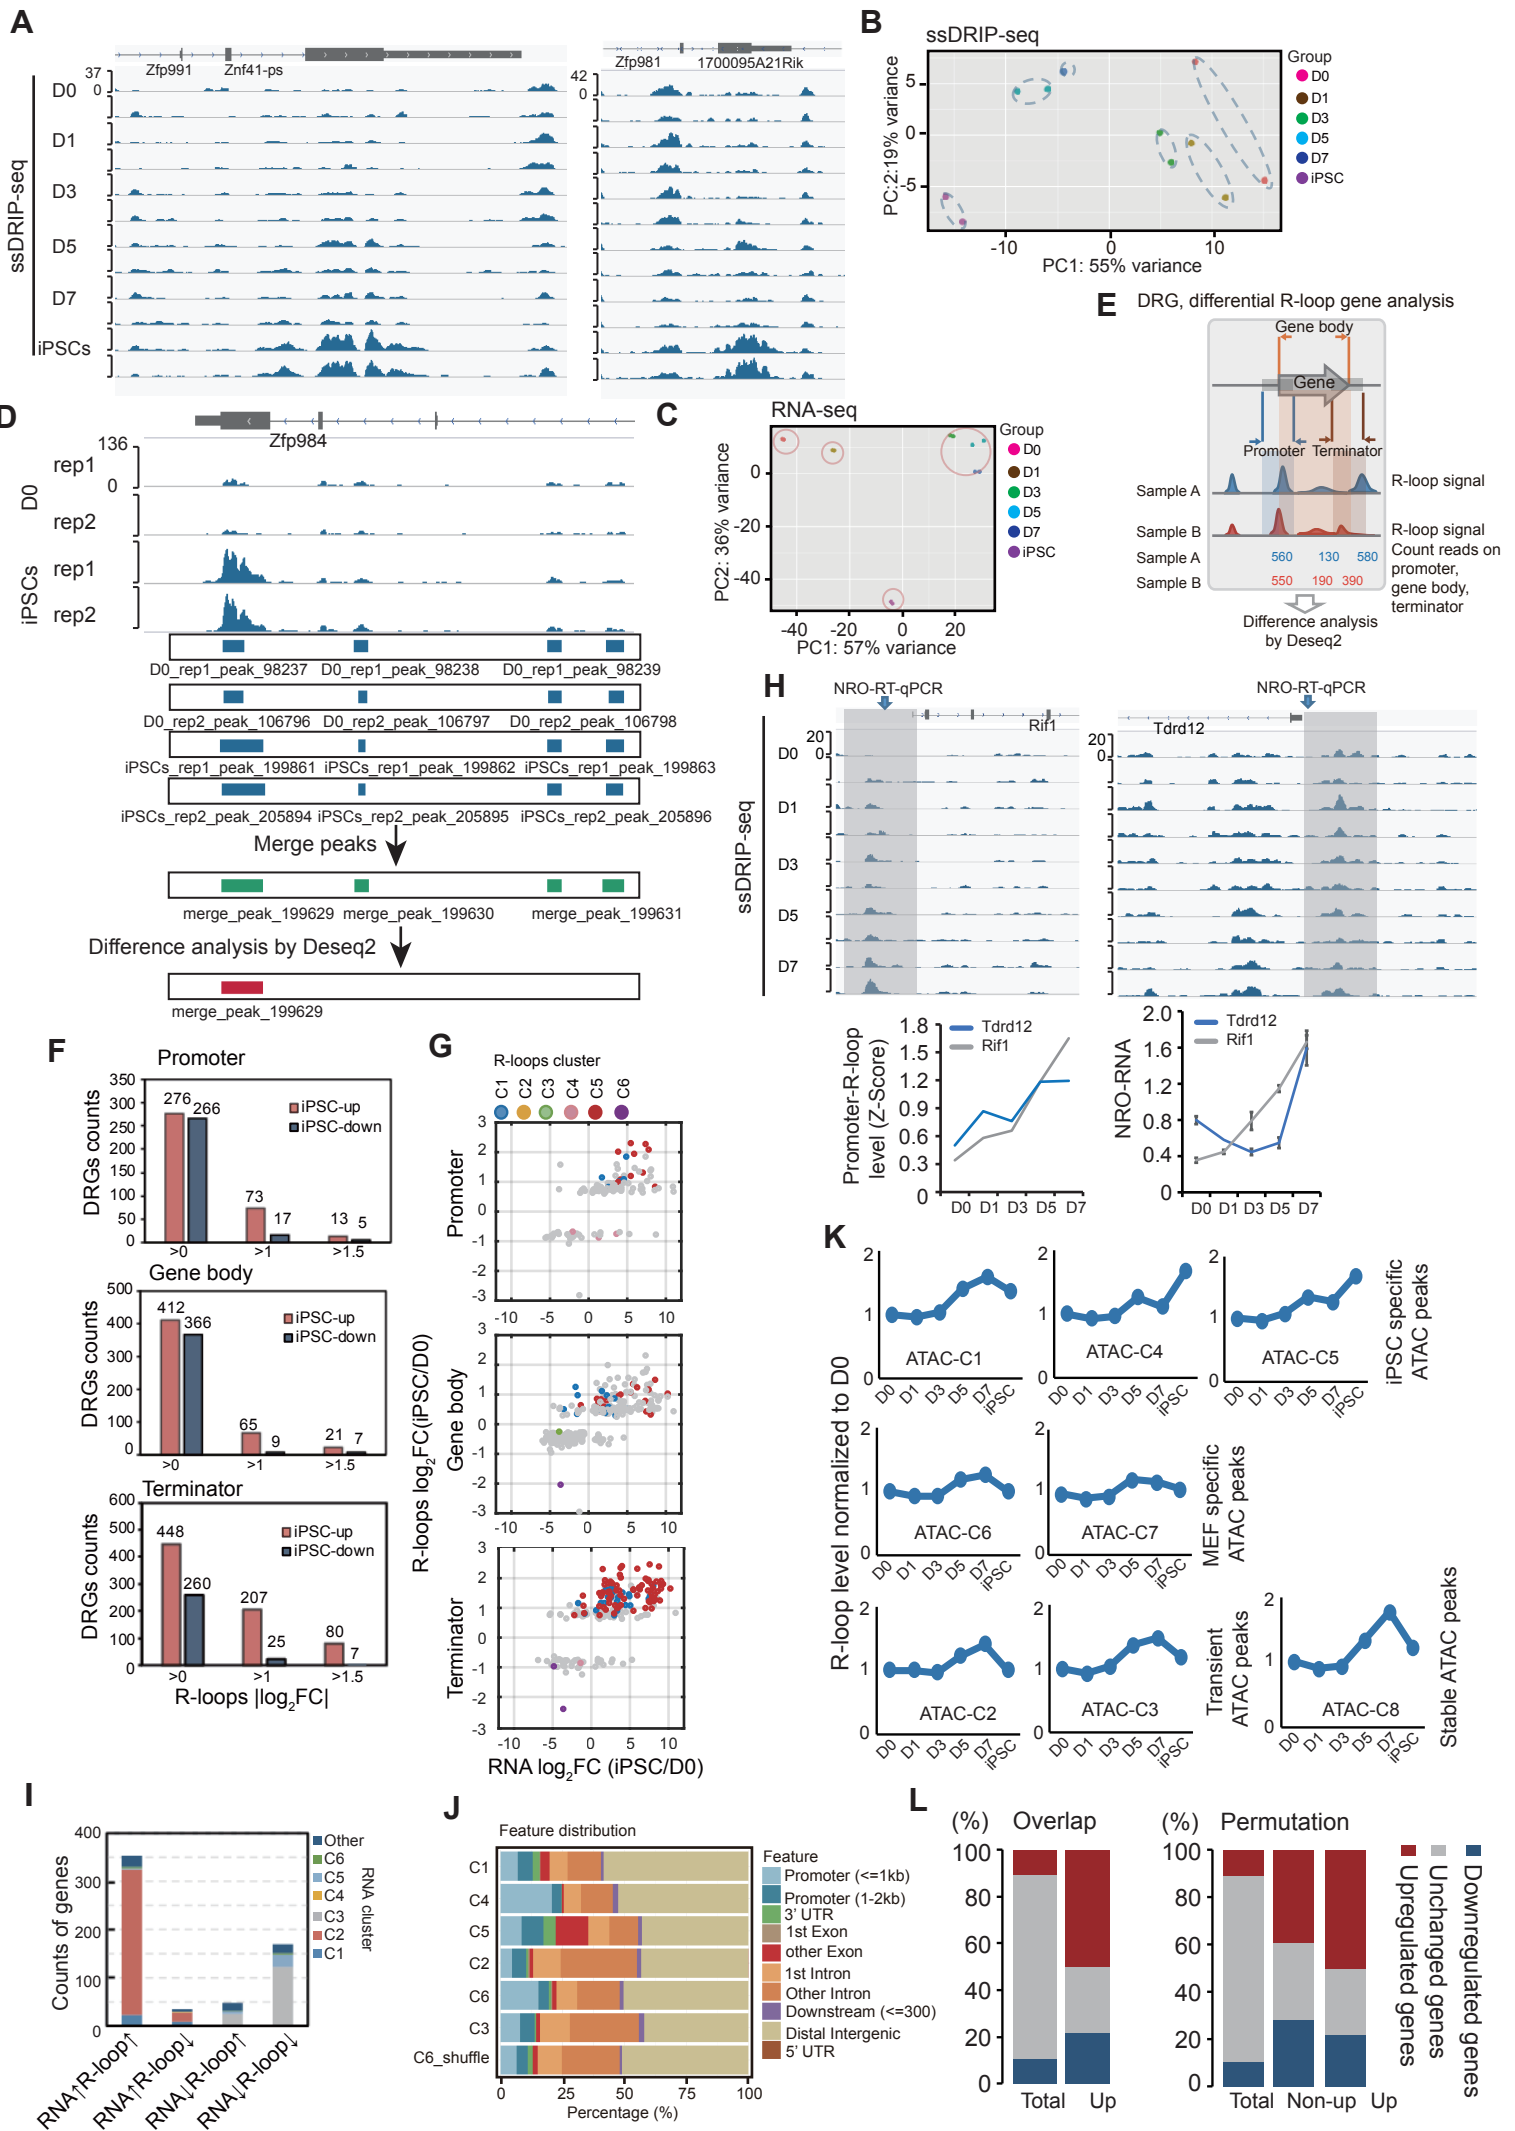

**Fig. S1. Analysis of ssDRIP-seq and RNA-seq of reprogrammed cells at different stages of reprogramming.** (A) The snapshots showing the distribution of ssDRIP-seq signals in two biological replicates at different stages of reprogramming. (B) PCA analysis of ssDRIP-seq signals of MEFs reprogrammed with OSKM at different stages of reprogramming. (C) PCA analysis of RNA-seq signals of MEFs reprogrammed with OSKM at different stages of reprogramming. (D) Schematic representation of the workflow for analyzing differential R-loop regions, see methods. (E) Schematic representation of the workflow for analyzing differential R-loop genes (DRGs). (F) Statistics of genes with increased or decreased R-loop levels ( $P < 0.01$ ) at promoter (upper), gene body (middle), or terminator (lower) region of genes in iPSCs compared with MEFs reprogrammed with OSKM on day 0. (G) Scatter plots showing gene expression (x axis) and R-loops (y axis) at promoter (upper), gene body (middle), or terminator (lower) region in iPSCs compared with MEFs reprogrammed with OSKM on day 0. The concurrently changed genes were shown and colored by R-loop clusters shown in Fig. 1B. (H) The snapshots showing the distribution of ssDRIP-seq signals of *Tdrd12* and *Rif1* loci in two biological replicates at different stages of reprogramming (top). The changes of R-loop level in *Tdrd12* and *Rif1* loci at different stages of reprogramming (bottom left). The changes in *Tdrd12* and *Rif1* expression were measured by NRO-RT-qPCR. All qPCR data were analyzed and normalized to *Gapdh* expression (bottom right). (I) Statistics of concurrently changed genes from different RNA clusters, sorted by dynamic relationships between gene expression and R-loops ( $\uparrow$  means upregulated,  $\downarrow$  means downregulated). (J) Distribution of differential R-loop regions from six R-loop clusters shown in Fig 1B. (K) R-loop level of different ATAC clusters defined by Knaupp et al. (2017). (L) Left, overlap of enhancers containing eRNAs and upregulated (Up) R-loops with upregulated, unchanged or downregulated expression of genes. Right, permutation test of enhancers containing eRNAs and upregulated (Up) R-loops or nonupregulated (Non-up) R-loops with upregulated, unchanged or downregulated expression of genes. The total genes were as a control.

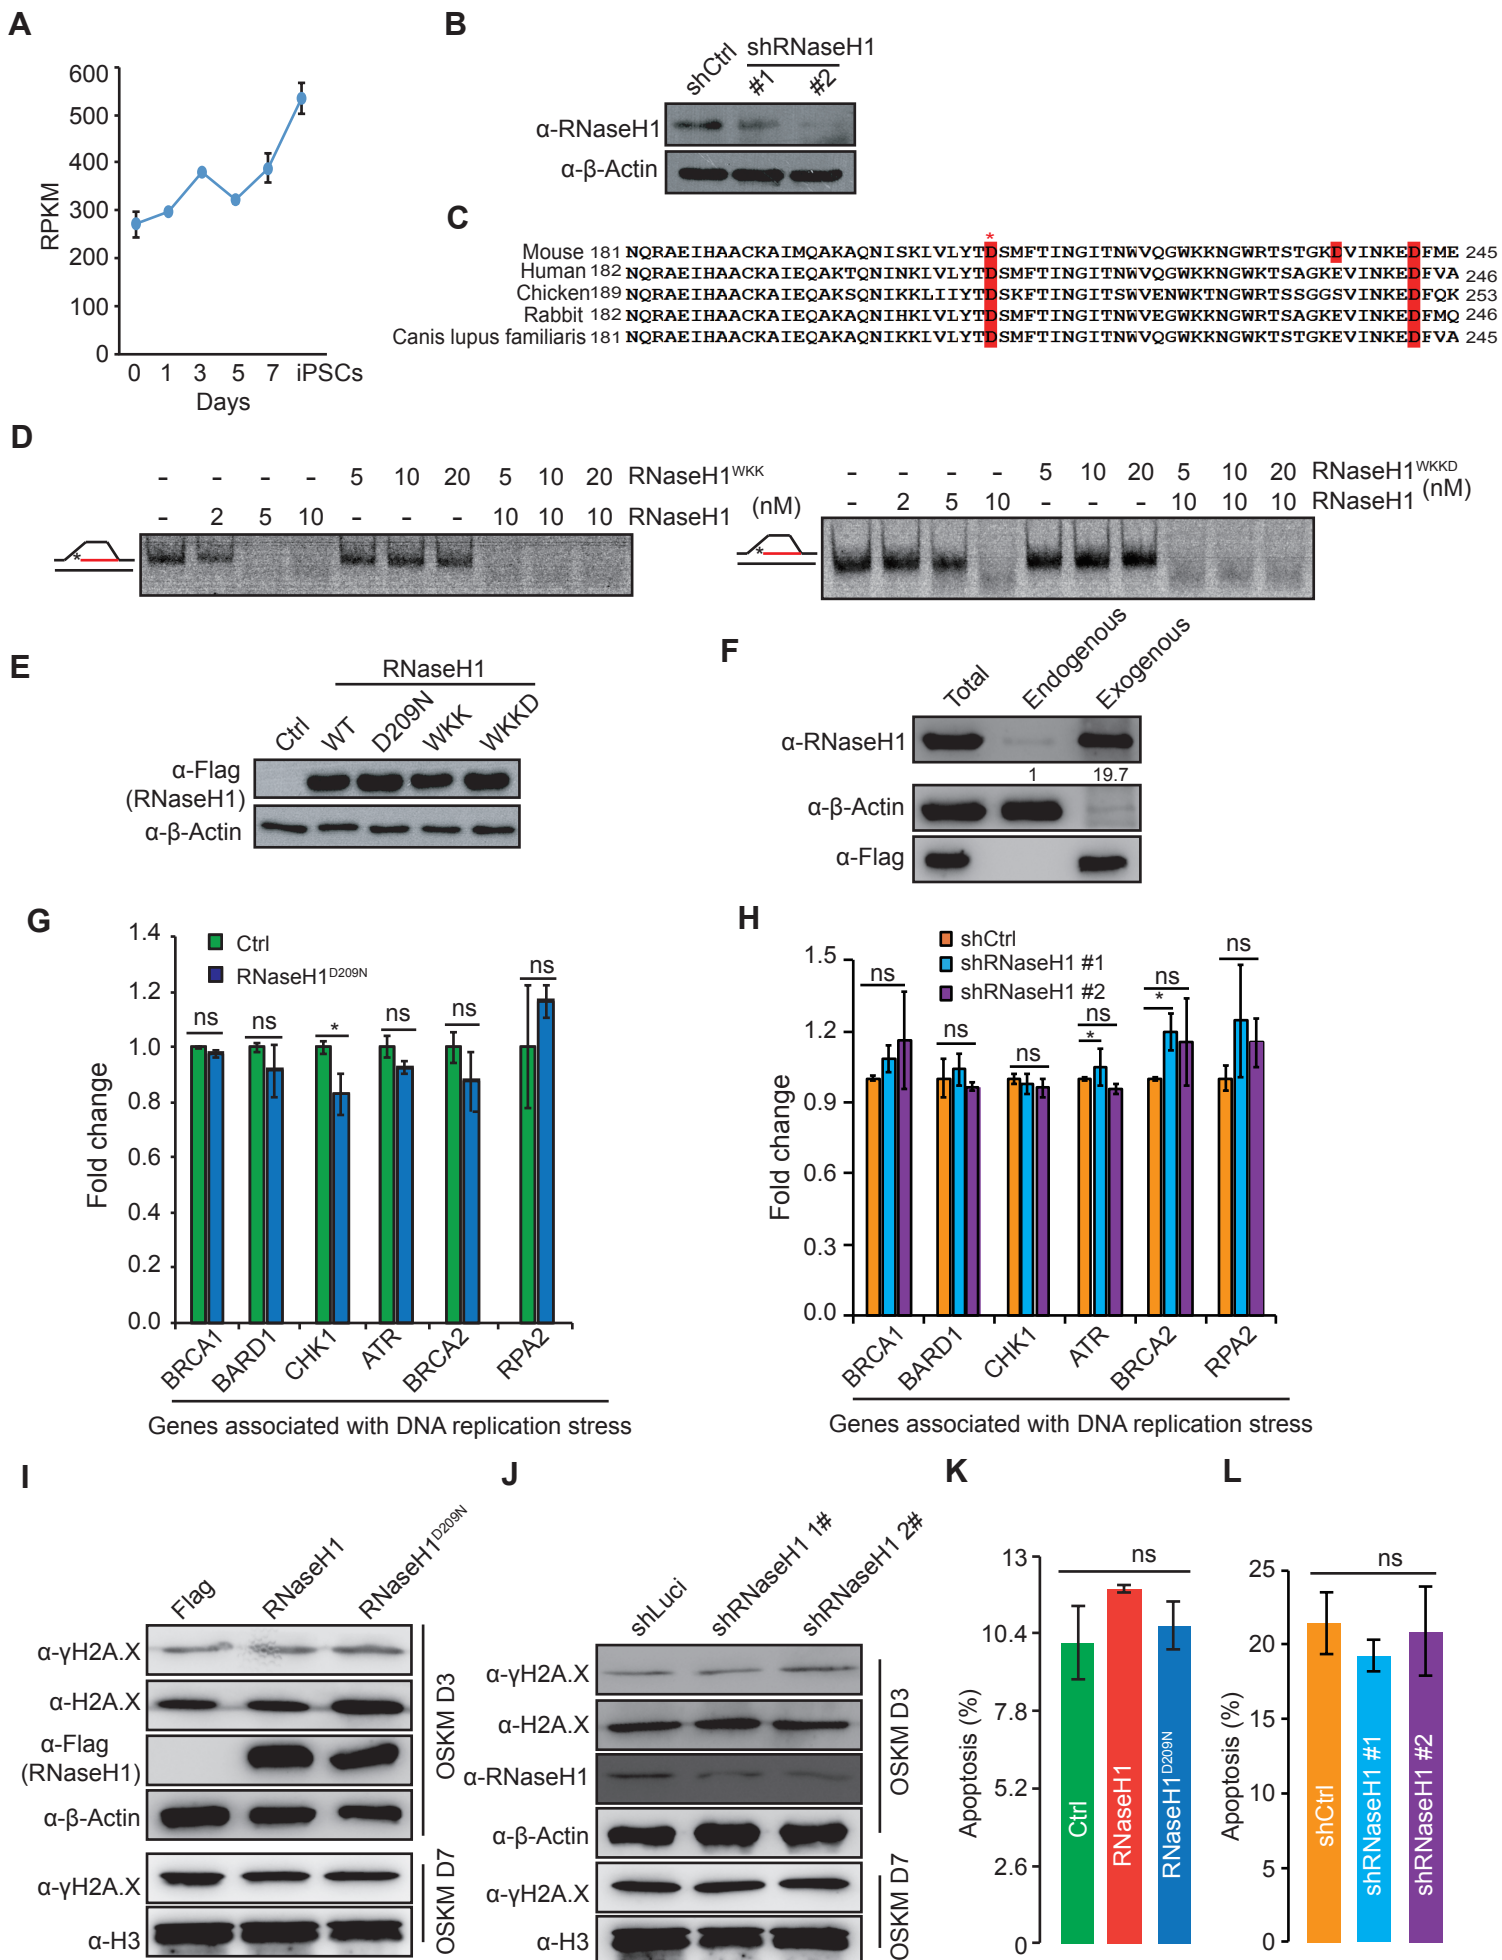

**Fig. S2. Verification of RNaseH1<sup>D209N</sup> and gene expression level.** **(A)** Expressional analysis of RNaseH1 at different stages of reprogramming (RPKM, reads per kilobase of exon model per million mapped reads of RNA-seq. Mean  $\pm$ SD). **(B)** Western blot to test the knockdown efficiency of RNaseH1 in MEFs reprogrammed with OSKM, together with control plasmid (pSuper-shLuci), and two independent RNaseH1 shRNAs on day 5 in iCD1 medium. **(C)** Sequence alignment of RNaseH1 in different species. Conserved residue of catalytic domain is highlighted in red asterisk. **(D)** R-loop substrate (Bottom, 25 nM) with Cy5-labeled (\*) RNA (red line) or DNA (black line) was incubated with the increasing concentrations of RNaseH1, RNaseH1<sup>WKK</sup> (Left) or RNaseH1<sup>WKKD</sup> (Right) in the presence of RNaseH1 (10 nM). The reaction was detected on a native polyacrylamide gel. **(E)** Western blot to test the overexpression efficiency of RNaseH1 in MEFs reprogrammed with OSKM, together with control plasmid (pMXs-Flag), pMXs-RNaseH1 and different RNaseH1 mutations on day 5 in iCD1 medium. **(F)** Western blot to test the expression of endogenous RNaseH1 and exogenous RNaseH1<sup>D209N</sup>. **(G)** qRT-PCR analysis of genes associated with DNA replication stress in MEFs reprogrammed with OSKM and pMXs-Flag (Ctrl) and pMXs-RNaseH1<sup>D209N</sup> on day 7. Error bars correspond to means  $\pm$  SD (\*P  $\leq$  0.05, \*\*P  $\leq$  0.01, \*\*\*P  $\leq$  0.001, ns, not significant, P  $\geq$  0.05, two-tailed Student's *t* test). **(H)** qRT-PCR analysis of genes associated with DNA replication stress in MEFs reprogrammed with OSKM and pSuper-shLuci (shCtrl), and two independent RNaseH1 shRNAs on day 7. Error bars correspond to means  $\pm$  SD (\*P  $\leq$  0.05, \*\*P  $\leq$  0.01, \*\*\*P  $\leq$  0.001, ns, not significant, P  $\geq$  0.05, two-tailed Student's *t* test). **(I)** Western blot to detect protein level of  $\gamma$ H2A.X in MEFs reprogrammed with OSKM and pMXs-Flag, pMXs-RNaseH1, pMXs-RNaseH1<sup>D209N</sup> and pSuper-shLuci (shCtrl), two independent RNaseH1 shRNAs on days 3 and 7, respectively. **(J)** Western blot to detect protein level of  $\gamma$ H2A.X in MEFs reprogrammed with OSKM and pSuper-shLuci (shCtrl), two independent RNaseH1 shRNAs on days 3 and 7, respectively. **(K)** Cell apoptosis of MEFs reprogrammed with OSKM and pMXs-Flag, pMXs-RNaseH1, pMXs-RNaseH1<sup>D209N</sup> and pSuper-shLuci (shCtrl), two independent RNaseH1 shRNAs on day 7. Error bars correspond to means  $\pm$  SD (\*P  $\leq$  0.05, \*\*P  $\leq$  0.01, \*\*\*P  $\leq$  0.001, ns, not significant, P  $\geq$  0.05, two-tailed Student's *t* test). **(L)** Cell apoptosis of MEFs reprogrammed with OSKM and pSuper-shLuci (shCtrl), two independent RNaseH1 shRNAs on day 7.

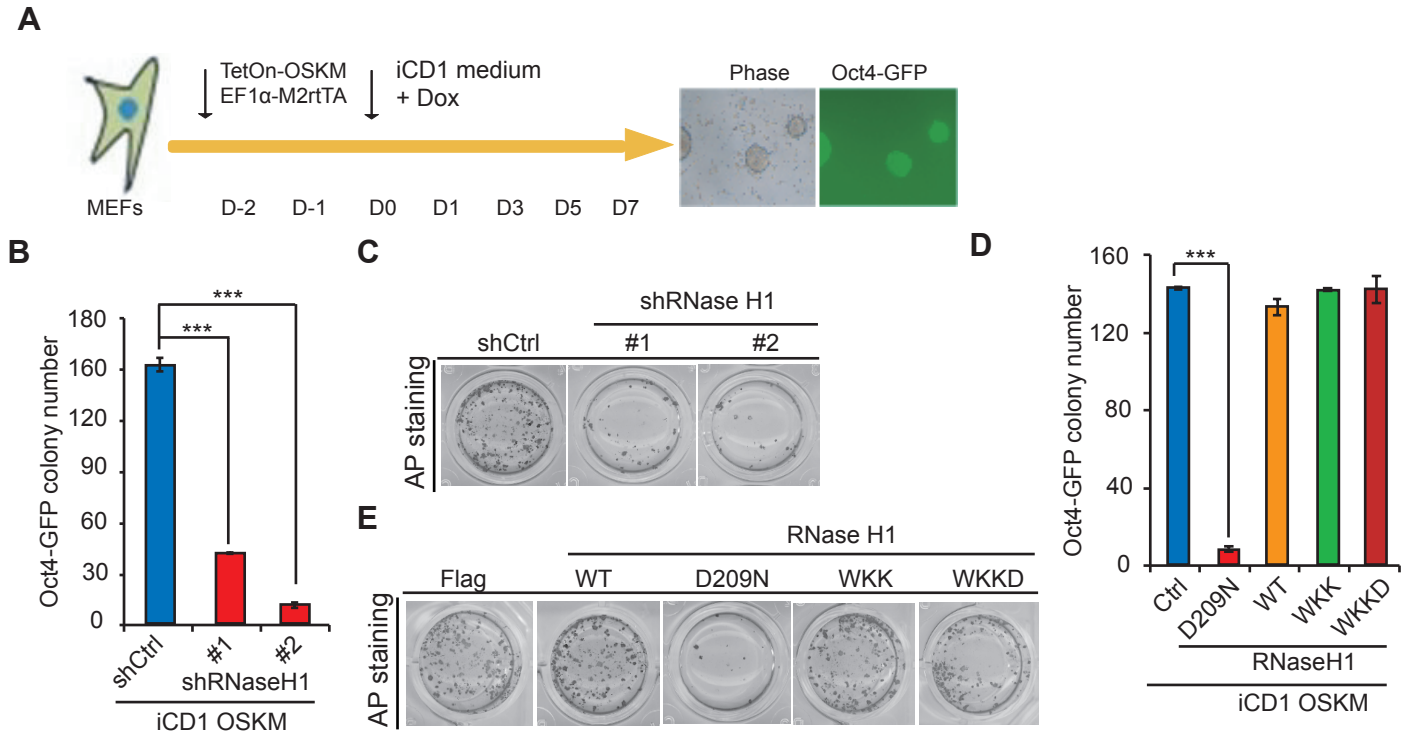

**Fig. S3. RNaseH1 activity loss inhibits reprogramming in a lentivirus-inducing system. (A)** Workflow of lentivirus-inducing reprogramming system. **(B)** *Oct4*-GFP colony number of MEFs reprogrammed with lentiviral infection of OSKM and retroviral infection of pSuper-shLuci (shCtrl), plus two independent shRNAs for RNaseH1 on day 8 in iCD1 medium. Error bars correspond to means  $\pm$  SD (\* $P \leq 0.05$ , \*\* $P \leq 0.01$ , \*\*\* $P \leq 0.001$ , two-tailed Student's *t* test). **(C)** AP staining on day 5, corresponding to Fig. S3B. **(D)** *Oct4*-GFP colony number of MEFs reprogrammed with lentiviral infection of OSKM and retroviral infection of pMXs-Flag (Ctrl), RNaseH1, and RNaseH1<sup>D209N</sup> on day 8 in iCD1 medium. Error bars correspond to means  $\pm$  SD (\* $P \leq 0.05$ , \*\* $P \leq 0.01$ , \*\*\* $P \leq 0.001$ , two-tailed Student's *t* test). **(E)** AP staining on day 5, corresponding to Fig. S3D.

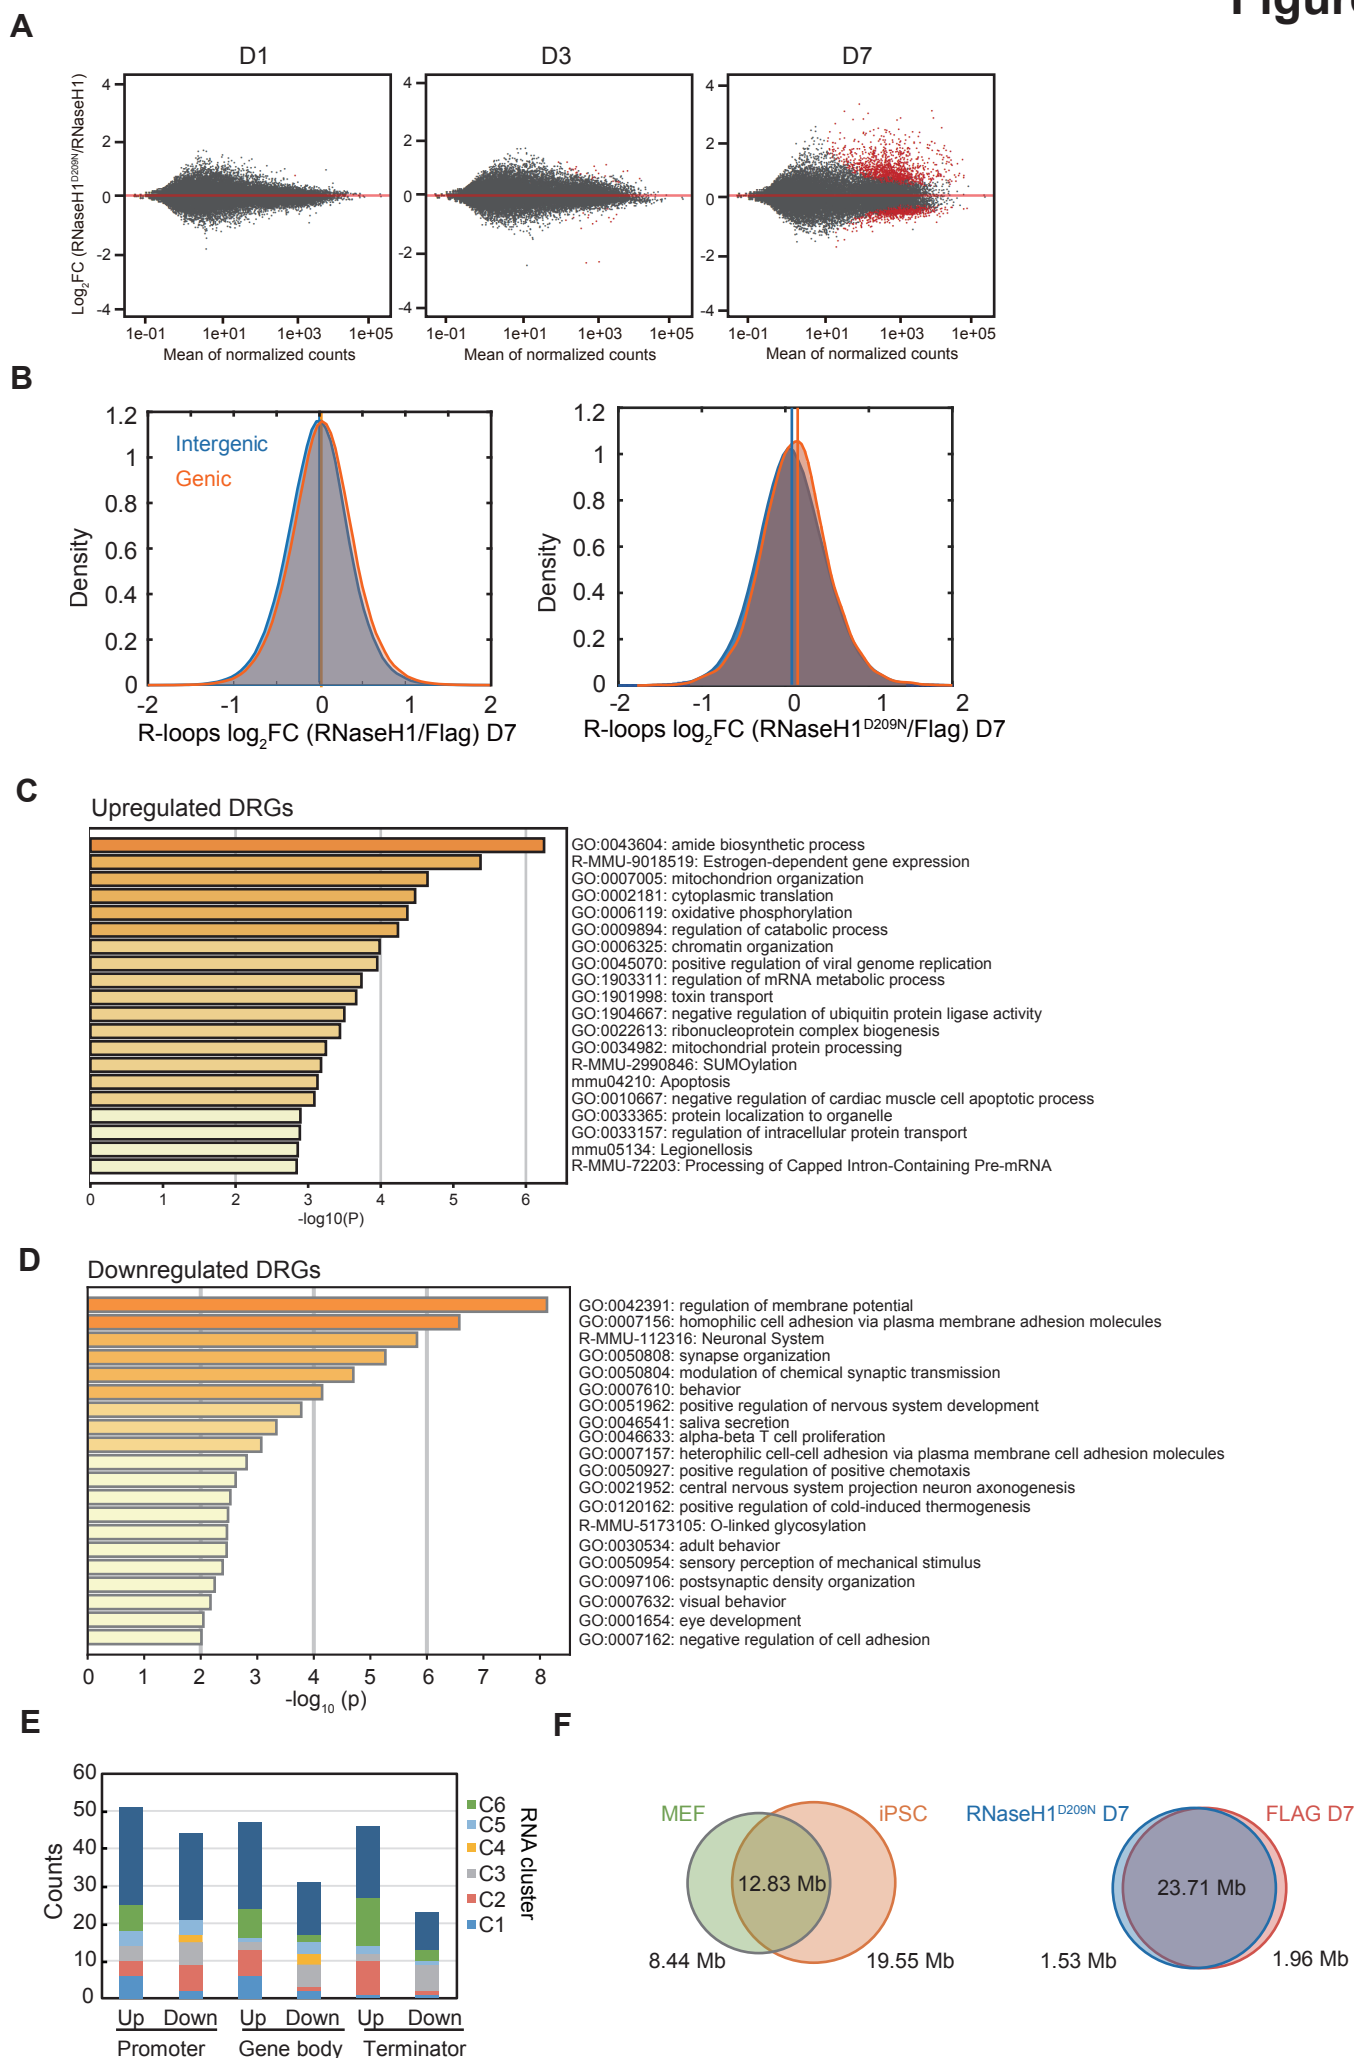



**Fig. S4. Analysis of ssDRIP-seq and RNA-seq of MEFs reprogrammed with OSKM and RNaseH1<sup>D209N</sup> at different stages of reprogramming. (A)** MA plots showing the DEGs (red dot) of RNaseH1<sup>D209N</sup>/RNaseH1 at different time points during reprogramming. **(B)** Kernel density of log<sub>2</sub> fold change (RNaseH1/Flag, D7, Left) and log<sub>2</sub> fold change (RNaseH1<sup>D209N</sup>/Flag, D7, Right) of intergenic (blue) or genic (containing promoter, terminator, and terminator, orange) R-loop levels on total R-loop regions, presented by histograms. Mean of intergenic (blue) or genic (orange) R-loop log<sub>2</sub> fold change was shown as vertical line. **(C)** GO categories of the upregulated DRGs by RNaseH1<sup>D209N</sup> compared with the control. **(D)** GO categories of the downregulated DRGs by RNaseH1<sup>D209N</sup> compared with the control. **(E)** Statistics of Prom-/Gb-/Term-concurrently changed genes shown in Fig. 3D with up- or downregulated RNA levels, sorted by RNA clusters shown in Fig. 1D. **(F)** Intersections of ATAC peaks. Left, MEFs and iPSCs. Right, RNaseH1<sup>D209N</sup> and Flag on day 7. The size of the genomic regions covered by peaks was shown.

A

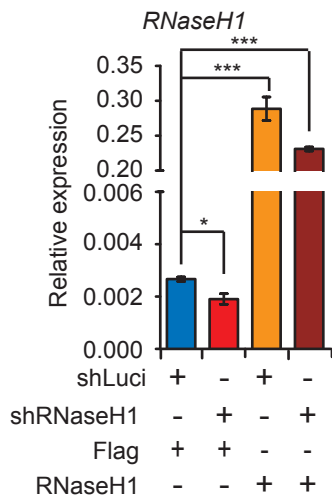

C

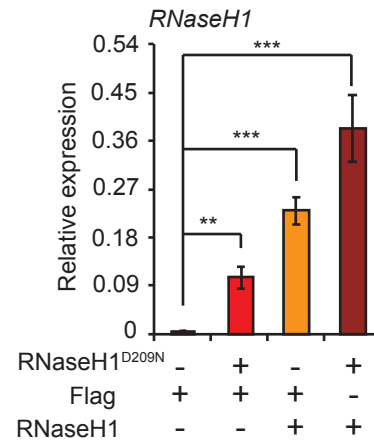

B

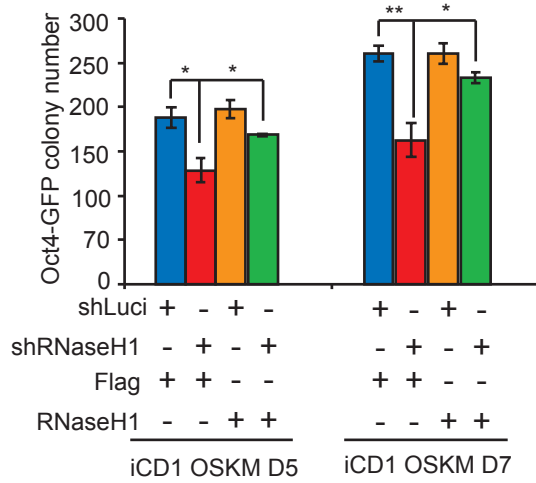

D

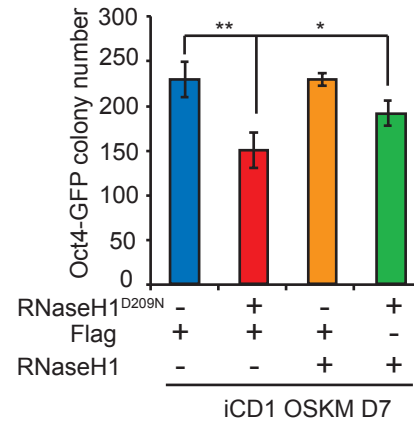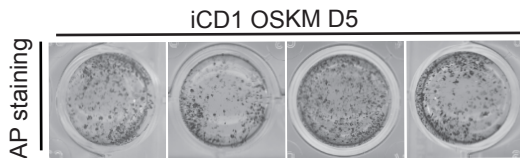

| shLuci | shRNaseH1 | Flag | RNaseH1 |
|--------|-----------|------|---------|
| +      | -         | +    | -       |
| -      | +         | +    | -       |
| +      | -         | -    | +       |
| -      | +         | -    | +       |

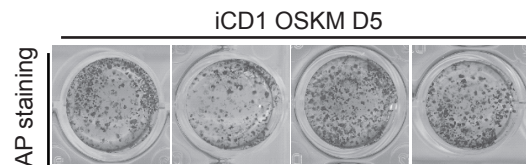

| RNaseH1 <sup>D209N</sup> | Flag | RNaseH1 |
|--------------------------|------|---------|
| -                        | +    | -       |
| +                        | +    | -       |
| -                        | +    | +       |
| +                        | -    | +       |

**Fig. S5. Overexpression of RNaseH1 rescues the negative effect of inhibition of RNaseH1 loss on reprogramming.** **(A)** qRT-PCR to test the expression of *RNaseH1* in MEFs reprogrammed with OSKM and retroviral infection of pMXs-Flag, RNaseH1, and control shLuci, RNaseH1 shRNA, on day 5 in iCD1 medium. Error bars correspond to means  $\pm$  SD (\* $P \leq 0.05$ , \*\* $P \leq 0.01$ , \*\*\* $P \leq 0.001$ , two-tailed Student's *t* test). **(B)** Top: *Oct4*-GFP colony number of MEFs reprogrammed with OSKM and retroviral infection of pMXs-Flag, RNaseH1, and control shLuci, RNaseH1 shRNA, on days 5 and 7, respectively, in iCD1 medium. The retrovirus was added at the same time. Bottom: AP staining on day 5. Error bars correspond to means  $\pm$  SD (\* $P \leq 0.05$ , \*\* $P \leq 0.01$ , \*\*\* $P \leq 0.001$ , two-tailed Student's *t* test). **(C)** qRT-PCR to test the expression of *RNaseH1* in MEFs reprogrammed with OSKM and retroviral infection of pMXs-Flag, RNaseH1, and RNaseH1<sup>D209N</sup> on day 5 in iCD1 medium. Error bars correspond to means  $\pm$  SD (\* $P \leq 0.05$ , \*\* $P \leq 0.01$ , \*\*\* $P \leq 0.001$ , two-tailed Student's *t* test). **(D)** Top: *Oct4*-GFP colony number of MEFs reprogrammed OSKM and retroviral infection of pMXs-Flag, RNaseH1, and RNaseH1<sup>D209N</sup> on day 7 in iCD1 medium. The retrovirus was added at the same time. Bottom: AP staining on day 5. Error bars correspond to means  $\pm$  SD (\* $P \leq 0.05$ , \*\* $P \leq 0.01$ , \*\*\* $P \leq 0.001$ , two-tailed Student's *t* test).

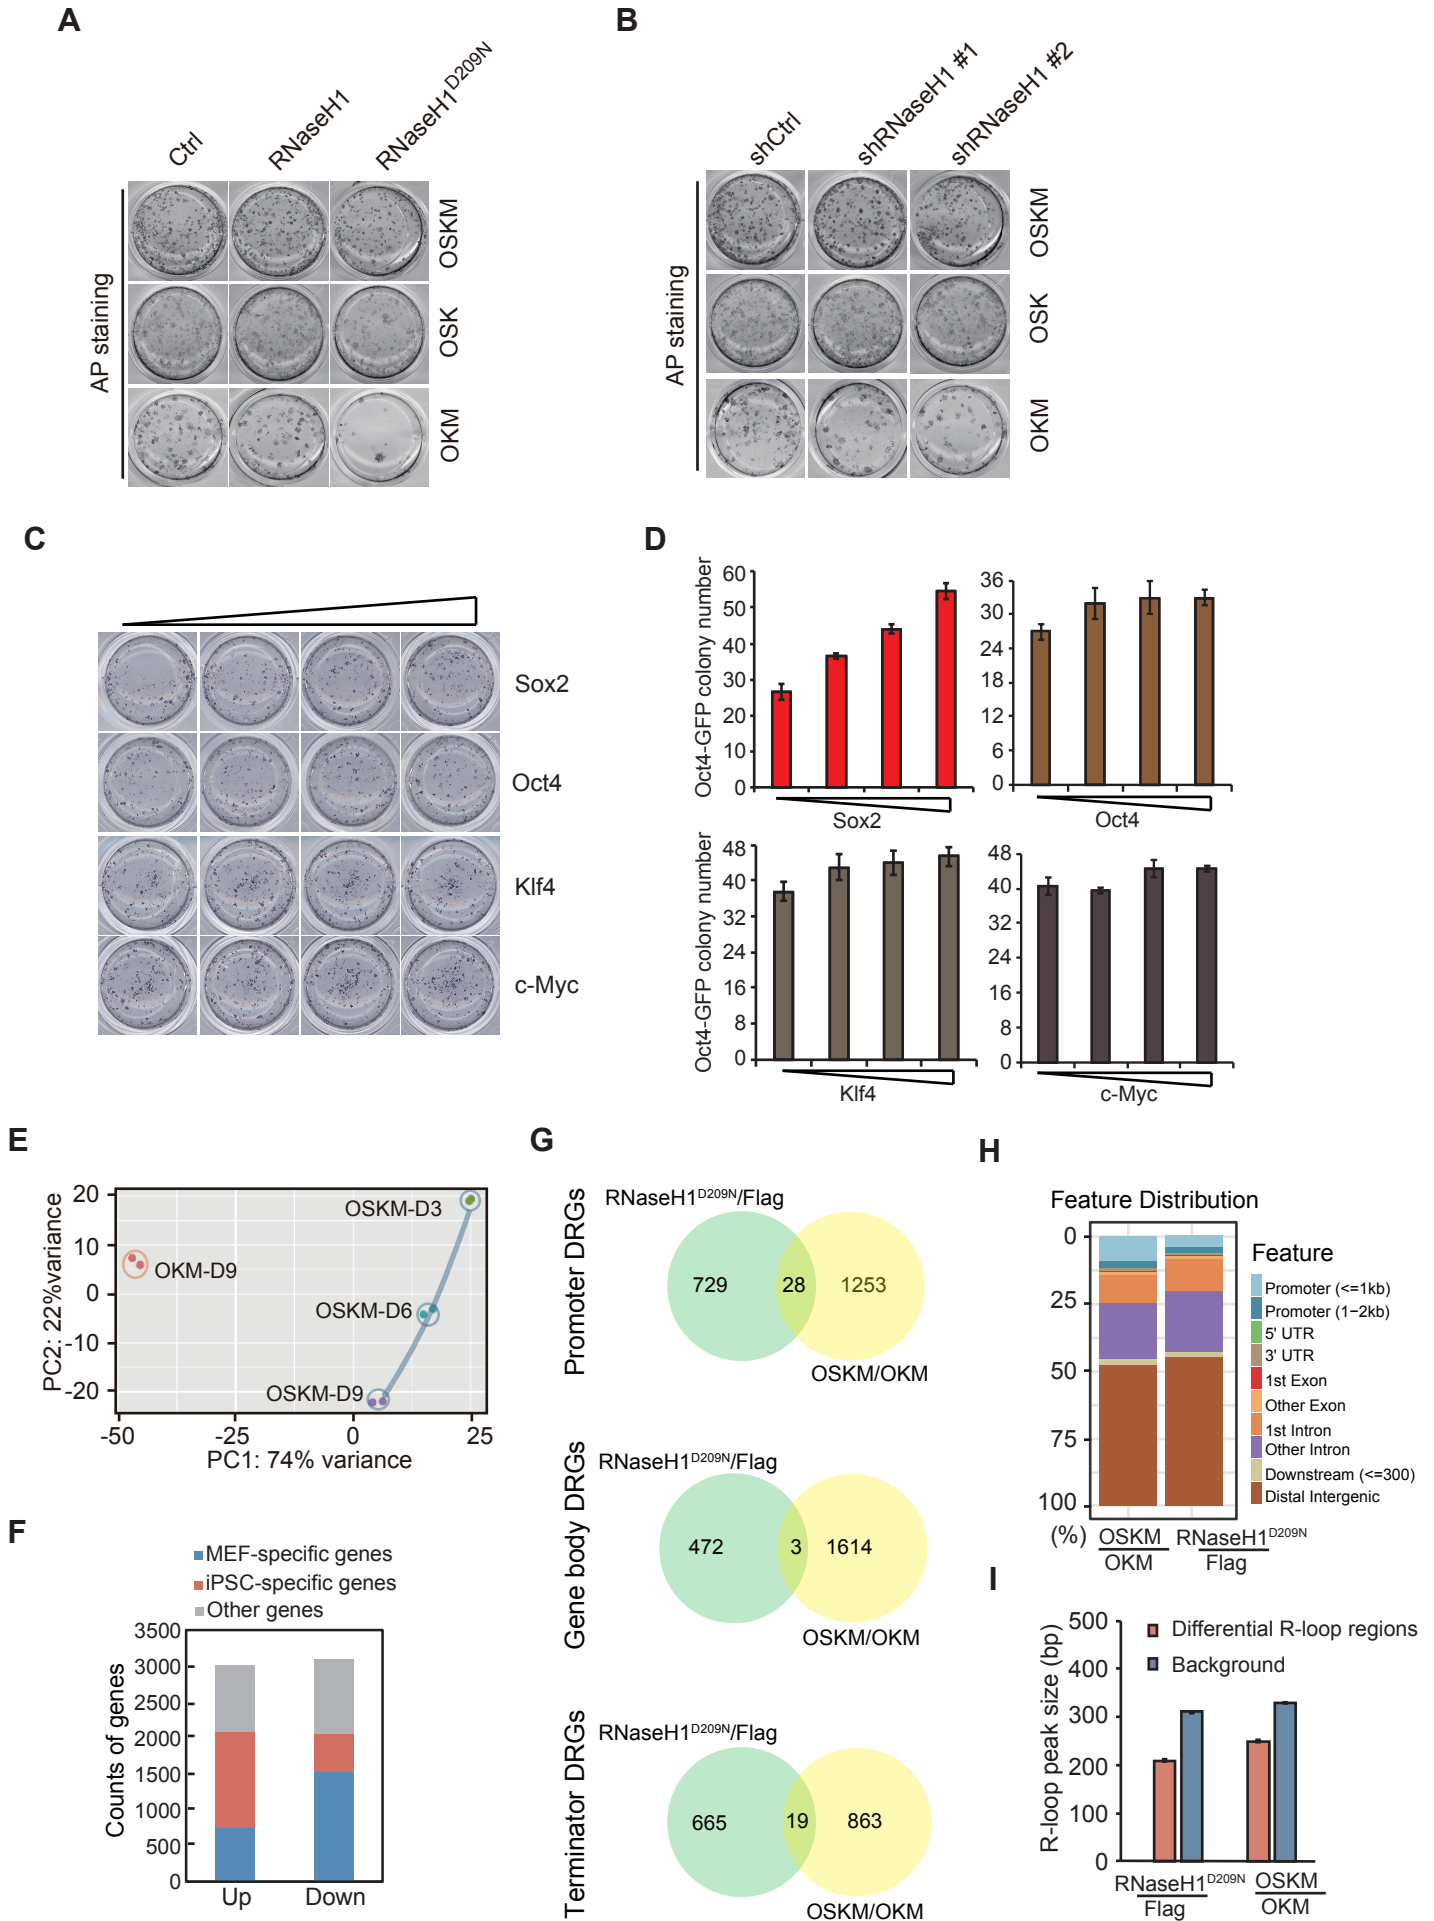

**Fig. S6. Sox2 induces reprogramming by maintaining high level of R-loops.** **(A)** AP staining corresponding to Fig 4A. **(B)** AP staining corresponding to Fig. 4B. **(C)** AP staining of MEFs reprogrammed with OSKM and RNaseH1<sup>D209N</sup> plus TetON-inducible Sox2, Oct4, Klf4 or c-Myc in iCD1 medium with 20, 50, 100, 500 ng/mL doxycycline. **(D)** *Oct4*-GFP colony number of MEFs reprogrammed with OSKM and RNaseH1<sup>D209N</sup> plus TetON-inducible Sox2, Oct4, Klf4 or c-Myc in iCD1 medium with 20, 50, 100, 500 ng/mL doxycycline. **(E)** PCA analysis of RNA-seq signals in OSKM- and OKM-reprogrammed MEFs at the indicated time points during reprogramming. **(F)** Statistics of genes with expression changes under both conditions (OSKM/OKM, D9, shown in Fig 4H) with up- or downregulated RNA levels, denoted as MEF-specific genes (dark blue), iPSC-specific genes (tangerine), and other genes (gray). **(G)** Venn diagram showing the overlap of differential R-loop regions in OSKM/OKM D9 (yellow), RNaseH1<sup>D209N</sup>/Flag D7 (green) from promoter (top), gene body (middle), or terminator (bottom) region. Counts of mutual or unique differential R-loop regions were shown. **(H)** Distribution of differential R-loop regions of RNaseH1<sup>D209N</sup>/Flag, and OSKM/OKM. **(I)** Bar chart showing the peak size of differential R-loop regions of RNaseH1<sup>D209N</sup>/Flag, and OSKM/OKM. The background peaks were used as a control.



**Fig. S7. Sox2 is involved in regulation of R-loop. (A)** Co-IP analysis of interaction between Sox2 and Dhx9. **(B)** Coomassie blue staining of purified recombinant mouse Sox2 and Ddx5, corresponding to Fig. 5F. M: marker. **(C)** The RNA/DNA + ssDNA substrate (25 nM) was incubated with increasing concentrations of deletions of Sox2 in the presence of Dhx9. The reaction was detected on a native polyacrylamide gel. **(D)** Schematic diagrams of deletions of Sox2 expression constructs. **(E)** Coomassie blue staining showing different deletions of recombinant mouse Sox2. **(F)** AP staining of MEFs reprogrammed with OKM, OKMS<sub>180</sub> or OSKM plus RNaseH1<sup>D209N</sup> in iCD1 medium on day 4 (top). Quantified number of AP positive colonies (bottom). **(G)** Western blot to detect protein level of Dhx9, Ddx5 and Sox2 in TetON-RNaseH1 mESCs before and after adding 2 µg/mL doxycycline. **(H)** DRIP-qPCR to monitor R-loop level at the selected sites modulated by dCas9-RNaseH1 during reprogramming. **(I)** DRIP-qPCR to monitor R-loop level at the selected sites modulated by dCas9-RNaseH1<sup>D209N</sup>.

**Table S1. Sequences of shRNA and sgRNA Oligos.****shRNA**

|                    |                                                                      |
|--------------------|----------------------------------------------------------------------|
| pSuper-shRNaseH1#1 | GATCCCCGCCTTTGTCAGGAGCTCTTCATTCAAGAGATGAAGAGCTCCTG<br>ACAAAGGCTTTTTA |
|                    | AGCTTAAAAAGCCTTTGTCAGGAGCTCTTCATCTCTTGAATGAAGAGCTCC<br>TGACAAAGGCGGG |
| pSuper-shRNaseH1#2 | GATCCCCGAGAACAAGTACAGGGAAATTCAGAGATTTCCCTGTACTTGTT<br>CTCTTTTTA      |
|                    | AGCTTAAAAAGAGAACAAGTACAGGGAAATCTCTTGAATTTCCCTGTACTT<br>GTTCTCGGG     |

**sgRNA**

|                |   |                           |
|----------------|---|---------------------------|
| <i>Timm13</i>  | F | CACCGTATTGTACGCATGCGCAGCG |
|                | R | AAACCGCTGCGCATGCGTACAATAC |
| <i>Ndufb6</i>  | F | CACCGAGGATAGACTAGTATGAGTC |
|                | R | AAACGACTCATACTAGTCTATCCTC |
| <i>Tmem205</i> | F | CACCGGGCATAATCCCCGTTCCACG |
|                | R | AAACCGTGGAACGGGGATTATGCC  |
| <i>Zic3</i>    | F | CACCGGAGACCCCCTAGGCGCTACC |
|                | R | AAACGGTAGCGCCTAGGGGGTCTCC |
| <i>Eras</i>    | F | CACCGAGACTGGGGGTTTGATCGCT |
|                | R | AAACAGCGATCAAACCCCCAGTCTC |
| <i>Lonrf1</i>  | F | CACCGCCTCCACATACTCCGAAAAG |
|                | R | AAACCTTTTCGGAGTATGTGGAGGC |



**Table S2. Primers Used for qPCR.**

| Application | Species | Gene           | Forward primer(5'-3')     | Reverse primer(5'-3')     |
|-------------|---------|----------------|---------------------------|---------------------------|
| RT-qPCR     | Mouse   | <i>RNaseH1</i> | CCAGGCCACCCCTTAAATGT      | CCAGCCCTGAACCCAGTTAG      |
| RT-qPCR     | Mouse   | <i>Gapdh</i>   | AACTTTGGCATTGTGGAAGGGCTCA | TTGGCAGCACCAGTGGATGCAGGGA |
| RT-qPCR     | Mouse   | <i>Brca1</i>   | ATGAGCTGGAGAGGATGCTG      | CTGGGCAGTTGCTGTCTTCT      |
| RT-qPCR     | Mouse   | <i>Brca2</i>   | TCTGCCACTGTGAAAAATGC      | TCAAGCTGGGCTGAAGATT       |
| RT-qPCR     | Mouse   | <i>Bard1</i>   | TGGTATGCCAGCCAGGAAAA      | CTTCATGCAACGGTGTCCA       |
| RT-qPCR     | Mouse   | <i>Chk1</i>    | TGCATTTGGATTCCCTGTGGC     | AGTTGAACTTCTCCATAGGCAC    |
| RT-qPCR     | Mouse   | <i>Atr</i>     | TGCAACAAATCGGTTCGATGG     | GTCATGATTCGCATGGGCAC      |
| RT-qPCR     | Mouse   | <i>Rpa2</i>    | CAGCTTGGTGGAGTCTGCTT      | TAGTCACAATCTGCGGTGGC      |
| DRIP-qPCR   | Mouse   | <i>Sox2</i>    | AACCAGAAGAACAGCCCGGA      | CTCCTGGGCCATCTTACGC       |
| DRIP-qPCR   | Mouse   | <i>Esrrb</i>   | AGGAGCCATTCCATCCATT       | ATCCCAACCCTCCCTCTACA      |
| DRIP-qPCR   | Mouse   | <i>Tfcp2l1</i> | GTCAGTGTTCCAGAGCGAGGA     | AGTTGCTCAGGGCGAGATTG      |
| DRIP-qPCR   | Mouse   | <i>Nr5a2</i>   | AAGGGAAGTGACAGCCCAAG      | ACCCAGTAGGCAAAAACGCAT     |
| DRIP-qPCR   | Mouse   | <i>Lin28a</i>  | GCCTACACCTTACTGGGCAC      | AGTTGACCGGTAGTTGGGTG      |
| DRIP-qPCR   | Mouse   | <i>Lrrc2</i>   | CCCTTGCTGAGAGCAGATT       | TGTTTGCTTGCTTGTTTCGCT     |
| DRIP-qPCR   | Mouse   | <i>Slc24a3</i> | CCTCTTCTCTGACTATTGGTGCAT  | TCGAATGTAGCCCCAGTCCT      |
| DRIP-qPCR   | Mouse   | <i>Lvrn</i>    | CGTCCTCAGTGTCCATCCATC     | GGATGAGCAGAAGTAGGGCT      |
| DRIP-qPCR   | Mouse   | <i>Pcdh9</i>   | TCACAACATCATGCCATTCATC    | GAGGCCTACCTAACCCCTTAC     |
| NRO-RT-qPCR | Mouse   | <i>Tdrd12</i>  | ACAGAGGATGCAAGCTGGTC      | ATGGTGCAACCTGTATGGGG      |
| NRO-RT-qPCR | Mouse   | <i>Rif1</i>    | TGAGAGGCACGTGAAACGAT      | AAAATACCGCCCTTCAGCCT      |
| NRO-RT-qPCR | Mouse   | <i>Gapdh</i>   | CCCTTGATATGGTGCAACCTG     | CACAAACATGGGGGCATCG       |

**Table S3. Lists of S9.6 co-IP interactome.**

| <b>Gene Name</b> | <b>Ensembl ID</b>  |
|------------------|--------------------|
| <i>Rpl18</i>     | ENSMUSG00000059070 |
| <i>Mta2</i>      | ENSMUSG00000071646 |
| <i>Ighv1-56</i>  | ENSMUSG00000094862 |
| <i>Hnrnp1</i>    | ENSMUSG00000015165 |
| <i>Atp5o</i>     | ENSMUSG00000022956 |
| <i>Prpf8</i>     | ENSMUSG00000020850 |
| <i>Snip1</i>     | ENSMUSG00000050213 |
| <i>Ilf3</i>      | ENSMUSG00000032178 |
| <i>Rps6</i>      | ENSMUSG00000028495 |
| <i>Cct3</i>      | ENSMUSG00000001416 |
| <i>Elavl1</i>    | ENSMUSG00000040028 |
| <i>Tardbp</i>    | ENSMUSG00000041459 |
| <i>Rps17</i>     | ENSMUSG00000061787 |
| <i>Smchd1</i>    | ENSMUSG00000024054 |
| <i>Rpl23</i>     | ENSMUSG00000071415 |
| <i>Abce1</i>     | ENSMUSG00000058355 |
| <i>Chd4</i>      | ENSMUSG00000063870 |
| <i>Rpl6</i>      | ENSMUSG00000029614 |
| <i>Mcm3</i>      | ENSMUSG00000041859 |
| <i>Rps4x</i>     | ENSMUSG00000031320 |
| <i>Utp20</i>     | ENSMUSG00000004356 |
| <i>Kifc1</i>     | ENSMUSG00000079553 |
| <i>Rfc2</i>      | ENSMUSG00000023104 |
| <i>Atp5f1b</i>   | ENSMUSG00000025393 |
| <i>L1td1</i>     | ENSMUSG00000087166 |
| <i>Bop1</i>      | ENSMUSG00000022557 |
| <i>Snrnp70</i>   | ENSMUSG00000063511 |
| <i>Rps3</i>      | ENSMUSG00000030744 |
| <i>Snrnp200</i>  | ENSMUSG00000003660 |
| <i>Fxr1</i>      | ENSMUSG00000027680 |
| <i>Rpl3</i>      | ENSMUSG00000060036 |
| <i>Gatad2b</i>   | ENSMUSG00000042390 |
| <i>Brd4</i>      | ENSMUSG00000024002 |
| <i>Rbmx1</i>     | ENSMUSG00000037070 |
| <i>Ncl</i>       | ENSMUSG00000026234 |
| <i>Tuba1b</i>    | ENSMUSG00000023004 |
| <i>Hmga1</i>     | ENSMUSG00000046711 |
| <i>Ddx21</i>     | ENSMUSG00000020075 |
| <i>Rps20</i>     | ENSMUSG00000028234 |
| <i>Atad3</i>     | ENSMUSG00000029036 |
| <i>Vdac1</i>     | ENSMUSG00000020402 |
| <i>Hspa1l</i>    | ENSMUSG00000007033 |
| <i>Srp72</i>     | ENSMUSG00000036323 |
| <i>Nono</i>      | ENSMUSG00000031311 |
| <i>Utp15</i>     | ENSMUSG00000041747 |
| <i>Hnrnp1</i>    | ENSMUSG00000066037 |
| <i>Wdr75</i>     | ENSMUSG00000025995 |
| <i>Rrs1</i>      | ENSMUSG00000061024 |
| <i>Rpl13a</i>    | ENSMUSG00000074129 |
| <i>Dnajc2</i>    | ENSMUSG00000029014 |
| <i>Smc3</i>      | ENSMUSG00000024974 |
| <i>Supt16</i>    | ENSMUSG00000035726 |

|                 |                    |
|-----------------|--------------------|
| <i>Eif4a1</i>   | ENSMUSG00000059796 |
| <i>Msh6</i>     | ENSMUSG00000005370 |
| <i>Top2a</i>    | ENSMUSG00000020914 |
| <i>Krt75</i>    | ENSMUSG00000022986 |
| <i>Rpl32</i>    | ENSMUSG00000057841 |
| <i>Uqcrc2</i>   | ENSMUSG00000030884 |
| <i>Utp6</i>     | ENSMUSG00000035575 |
| <i>Imp3</i>     | ENSMUSG00000032288 |
| <i>Rpl17</i>    | ENSMUSG00000062328 |
| <i>Gm8994</i>   | ENSMUSG00000094973 |
| <i>Dhx15</i>    | ENSMUSG00000029169 |
| <i>Ftsj3</i>    | ENSMUSG00000020706 |
| <i>Rpl7</i>     | ENSMUSG00000043716 |
| <i>Nvl</i>      | ENSMUSG00000026516 |
| <i>Srrm2</i>    | ENSMUSG00000039218 |
| <i>Ptbp1</i>    | ENSMUSG00000006498 |
| <i>Eef1g</i>    | ENSMUSG00000071644 |
| <i>Utp18</i>    | ENSMUSG00000054079 |
| <i>Hnrnpul2</i> | ENSMUSG00000071659 |
| <i>Mrpl11</i>   | ENSMUSG00000024902 |
| <i>Tra2a</i>    | ENSMUSG00000029817 |
| <i>Rpl36</i>    | ENSMUSG00000057863 |
| <i>Rps16</i>    | ENSMUSG00000037563 |
| <i>Acsl3</i>    | ENSMUSG00000032883 |
| <i>Atp5c1</i>   | ENSMUSG00000025781 |
| <i>Nop2</i>     | ENSMUSG00000038279 |
| <i>Vdac2</i>    | ENSMUSG00000021771 |
| <i>Hist2h4</i>  | ENSMUSG00000091405 |
| <i>Srsf7</i>    | ENSMUSG00000024097 |
| <i>Kif2c</i>    | ENSMUSG00000028678 |
| <i>Alyref</i>   | ENSMUSG00000025134 |
| <i>Glyr1</i>    | ENSMUSG00000022536 |
| <i>Hnrnpk</i>   | ENSMUSG00000021546 |
| <i>Kpna2</i>    | ENSMUSG00000018362 |
| <i>Utp3</i>     | ENSMUSG00000070697 |
| <i>Nat10</i>    | ENSMUSG00000027185 |
| <i>Rps27l</i>   | ENSMUSG00000036781 |
| <i>Pak1ip1</i>  | ENSMUSG00000038683 |
| <i>p16</i>      | ENSMUSG00000030483 |
| <i>Krt19</i>    | ENSMUSG00000020911 |
| <i>Eif6</i>     | ENSMUSG00000027613 |
| <i>Atp5f1a</i>  | ENSMUSG00000025428 |
| <i>Raly</i>     | ENSMUSG00000027593 |
| <i>Rpl10</i>    | ENSMUSG00000008682 |
| <i>Gatad2a</i>  | ENSMUSG00000036180 |
| <i>Sgpl1</i>    | ENSMUSG00000020097 |
| <i>Pin4</i>     | ENSMUSG00000079480 |
| <i>Mcm2</i>     | ENSMUSG00000002870 |
| <i>Ncapg</i>    | ENSMUSG00000015880 |
| <i>Dnmt1</i>    | ENSMUSG00000004099 |
| <i>Rbmxl2</i>   | ENSMUSG00000073894 |
| <i>Smc2</i>     | ENSMUSG00000028312 |
| <i>Igkc</i>     | ENSMUSG00000076609 |
| <i>Isg20l2</i>  | ENSMUSG00000048039 |
| <i>Phb2</i>     | ENSMUSG00000004264 |
| <i>Noc2l</i>    | ENSMUSG00000095567 |

|                  |                    |
|------------------|--------------------|
| <i>Hnrnpm</i>    | ENSMUSG00000059208 |
| <i>Ddx42</i>     | ENSMUSG00000020705 |
| <i>Srsf5</i>     | ENSMUSG00000021134 |
| <i>Eef2</i>      | ENSMUSG00000034994 |
| <i>Ddx27</i>     | ENSMUSG00000017999 |
| <i>Rpsa</i>      | ENSMUSG00000032518 |
| <i>Hnrnpa1</i>   | ENSMUSG00000046434 |
| <i>Anln</i>      | ENSMUSG00000036777 |
| <i>Fcf1</i>      | ENSMUSG00000021243 |
| <i>Apc2</i>      | ENSMUSG00000020135 |
| <i>Poldip3</i>   | ENSMUSG00000041815 |
| <i>Rfc3</i>      | ENSMUSG00000033970 |
| <i>Gtpbp4</i>    | ENSMUSG00000021149 |
| <i>Vars</i>      | ENSMUSG00000007029 |
| <i>Eif2a</i>     | ENSMUSG00000027810 |
| <i>H2afy</i>     | ENSMUSG00000015937 |
| <i>Mocs3</i>     | ENSMUSG00000074576 |
| <i>GAPDH</i>     | ENSMUSG00000057666 |
| <i>Phf5a</i>     | ENSMUSG00000061360 |
| <i>Sf3a2</i>     | ENSMUSG00000020211 |
| <i>Rpl27a</i>    | ENSMUSG00000046364 |
| <i>Smpd4</i>     | ENSMUSG00000005899 |
| <i>Ddx5</i>      | ENSMUSG00000020719 |
| <i>Hnrnpc</i>    | ENSMUSG00000060373 |
| <i>Hspa8</i>     | ENSMUSG00000015656 |
| <i>Rpl21</i>     | ENSMUSG00000041453 |
| <i>Rps26</i>     | ENSMUSG00000025362 |
| <i>Ctcf</i>      | ENSMUSG00000005698 |
| <i>Rpl27</i>     | ENSMUSG00000063316 |
| <i>Rpl15</i>     | ENSMUSG00000012405 |
| <i>Rplp0</i>     | ENSMUSG00000067274 |
| <i>Wdr12</i>     | ENSMUSG00000026019 |
| <i>Snrpb</i>     | ENSMUSG00000027404 |
| <i>Hist1h2aa</i> | ENSMUSG00000060081 |
| <i>Rpl7a</i>     | ENSMUSG00000062647 |
| <i>Mcm5</i>      | ENSMUSG00000005410 |
| <i>Dcaf13</i>    | ENSMUSG00000022300 |
| <i>Slc25a3</i>   | ENSMUSG00000061904 |
| <i>Krr1</i>      | ENSMUSG00000063334 |
| <i>Sfxn1</i>     | ENSMUSG00000021474 |
| <i>Rpl34</i>     | ENSMUSG00000062006 |
| <i>Trim28</i>    | ENSMUSG00000005566 |
| <i>Snrpd3</i>    | ENSMUSG00000020180 |
| <i>Vim</i>       | ENSMUSG00000026728 |
| <i>Msh2</i>      | ENSMUSG00000024151 |
| <i>Adnp</i>      | ENSMUSG00000051149 |
| <i>Aifm1</i>     | ENSMUSG00000036932 |
| <i>Rpf2</i>      | ENSMUSG00000038510 |
| <i>Slc25a4</i>   | ENSMUSG00000031633 |
| <i>Rrp12</i>     | ENSMUSG00000035049 |
| <i>Prpf40a</i>   | ENSMUSG00000061136 |
| <i>Hells</i>     | ENSMUSG00000025001 |
| <i>Srrt</i>      | ENSMUSG00000037364 |
| <i>Dhx8</i>      | ENSMUSG00000034931 |
| <i>Slc16a1</i>   | ENSMUSG00000032902 |
| <i>Hnrnp1</i>    | ENSMUSG00000007850 |

|                  |                    |
|------------------|--------------------|
| <i>Ruvb1</i>     | ENSMUSG00000030079 |
| <i>Ssrp1</i>     | ENSMUSG00000027067 |
| <i>Nifk</i>      | ENSMUSG00000026377 |
| <i>Ass1</i>      | ENSMUSG00000076441 |
| <i>mKIAA0034</i> | ENSMUSG00000047126 |
| <i>Bms1</i>      | ENSMUSG00000030138 |
| <i>Ran</i>       | ENSMUSG00000029430 |
| <i>Rpl30</i>     | ENSMUSG00000058600 |
| <i>Tufm</i>      | ENSMUSG00000073838 |
| <i>Mki67</i>     | ENSMUSG00000031004 |
| <i>Ddx18</i>     | ENSMUSG00000001674 |
| <i>Ddx3x</i>     | ENSMUSG00000000787 |
| <i>Rpl22</i>     | ENSMUSG00000028936 |
| <i>Ezh1</i>      | ENSMUSG00000006920 |
| <i>Hnrnpf</i>    | ENSMUSG00000042079 |
| <i>Wdr36</i>     | ENSMUSG00000038299 |
| <i>Spout1</i>    | ENSMUSG00000039660 |
| <i>Prpf19</i>    | ENSMUSG00000024735 |
| <i>Wdr46</i>     | ENSMUSG00000024312 |
| <i>Rpl10a</i>    | ENSMUSG00000037805 |
| <i>Gm10036</i>   | ENSMUSG00000058064 |
| <i>Rps8</i>      | ENSMUSG00000047675 |
| <i>Hist1h2bq</i> | ENSMUSG00000069307 |
| <i>Eif3d</i>     | ENSMUSG00000016554 |
| <i>Phb</i>       | ENSMUSG00000038845 |
| <i>Rpl4</i>      | ENSMUSG00000032399 |
| <i>Fytd1</i>     | ENSMUSG00000022800 |
| <i>Rpl18a</i>    | ENSMUSG00000045128 |
| <i>Tbl3</i>      | ENSMUSG00000040688 |
| <i>Mcm6</i>      | ENSMUSG00000026355 |
| <i>Rpl8</i>      | ENSMUSG00000003970 |
| <i>Hnrnpa2b1</i> | ENSMUSG00000004980 |
| <i>Ybx1</i>      | ENSMUSG00000028639 |
| <i>Tmpo</i>      | ENSMUSG00000019961 |
| <i>Rack1</i>     | ENSMUSG00000020372 |
| <i>Hdac2</i>     | ENSMUSG00000019777 |
| <i>Rps23</i>     | ENSMUSG00000049517 |
| <i>Actc1</i>     | ENSMUSG00000068614 |
| <i>Rps27a</i>    | ENSMUSG00000020460 |
| <i>Ddx51</i>     | ENSMUSG00000029504 |
| <i>Abcf1</i>     | ENSMUSG00000038762 |
| <i>Orc1</i>      | ENSMUSG00000028587 |
| <i>Trip12</i>    | ENSMUSG00000026219 |
| <i>Lbr</i>       | ENSMUSG00000004880 |
| <i>Actb</i>      | ENSMUSG00000029580 |
| <i>Lmnb1</i>     | ENSMUSG00000024590 |
| <i>Pdcd11</i>    | ENSMUSG00000025047 |
| <i>Smarca4</i>   | ENSMUSG00000032187 |
| <i>Uhrf1</i>     | ENSMUSG00000001228 |
| <i>Slc25a5</i>   | ENSMUSG00000016319 |
| <i>Trap1</i>     | ENSMUSG00000005981 |
| <i>Utp14a</i>    | ENSMUSG00000063785 |
| <i>Pcbp1</i>     | ENSMUSG00000051695 |
| <i>Cpsf7</i>     | ENSMUSG00000034820 |
| <i>Mcm4</i>      | ENSMUSG00000022673 |
| <i>Rrp15</i>     | ENSMUSG00000001305 |

|                |                    |
|----------------|--------------------|
| <i>Rpl19</i>   | ENSMUSG00000017404 |
| <i>Zc3h18</i>  | ENSMUSG00000017478 |
| <i>Baz2a</i>   | ENSMUSG00000040054 |
| <i>Rfc1</i>    | ENSMUSG00000029191 |
| <i>Srp68</i>   | ENSMUSG00000020780 |
| <i>Imp4</i>    | ENSMUSG00000026127 |
| <i>Tdh</i>     | ENSMUSG00000021953 |
| <i>Dhx9</i>    | ENSMUSG00000042699 |
| <i>Smarca5</i> | ENSMUSG00000031715 |
